# Supplementary material for: Community benchmarking and evaluation of human unannotated microprotein detection by mass spectrometry based proteomics
Source: Springer Nature journal article supplement (doi:10.1038/s41467-025-68002-x), 2026-01-21
Supplement: MOESM2 [file 41467_2025_68002_MOESM2_ESM.pdf › 41467_2025_68002_MOESM2_ESM.pdf]

## **Description of Additional Supplementary Files**

File Name: Supplementary Data 1

Legend: Properties of all PSMs reported to support unannotated protein detections that were considered in this study.

File Name: Supplementary Data 2

Legend: Studies reporting detection of each peptide. For each study, a 1 indicates that the specified peptide was reported in that study.

File Name: Supplementary Data 3

Legend: Evaluator ratings for each evaluated PSM. The different curators are specified by different letters.

File Name: Supplementary Data 4

Legend: NetMHC binding prediction for evaluated immunopeptides. Predicted binding affinity, binding rank, and binding class are taken from NetMHC output.

File Name: Supplementary Data 5

Legend: List of Ribo-seq studies analyzed. Identifiers are from Sequence Read Archive.

File Name: Supplementary Data 6

Legend: Translation levels for analyzed ORFs. The hg38 coordinates for each ORF are given. The read counts indicate the total reads mapping to the ORF across studies, while the translation rate indicates reads per codon. The p-values are taken from iRibo output.
